# Supplementary material for: Hydrologic feasibility of artificial forestation in the semi-arid Loess Plateau of China
Source: Copernicus journal article supplement (doi:10.5194/hess-15-2519-2011), 2011-08-15
Supplement: Supplementary file 1 [file hess-15-2519-2011-supplement.pdf]

## Supplemental Figures

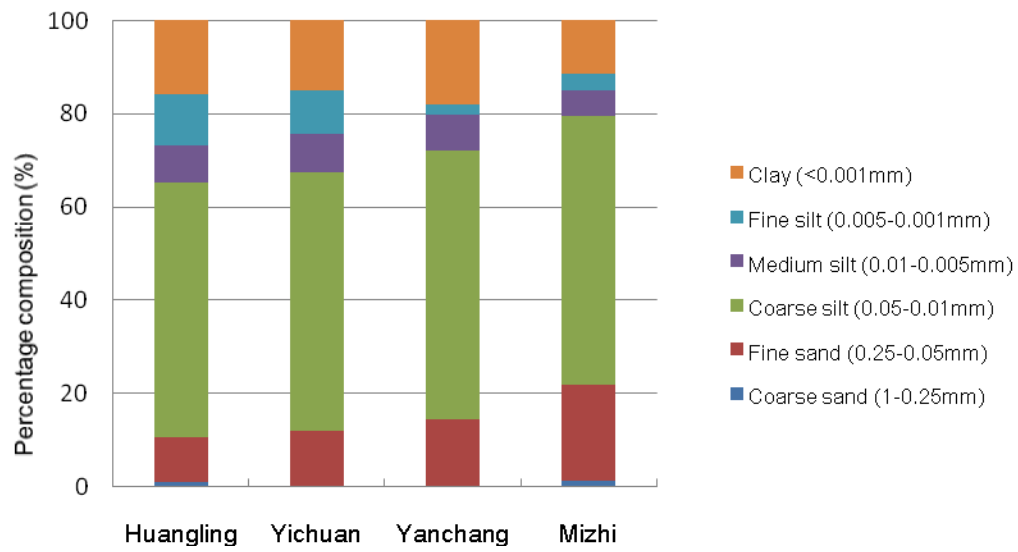

Supplemental Figure 1. Soil particle size distribution in the northern Shaanxi Province (Zhang, 2002).

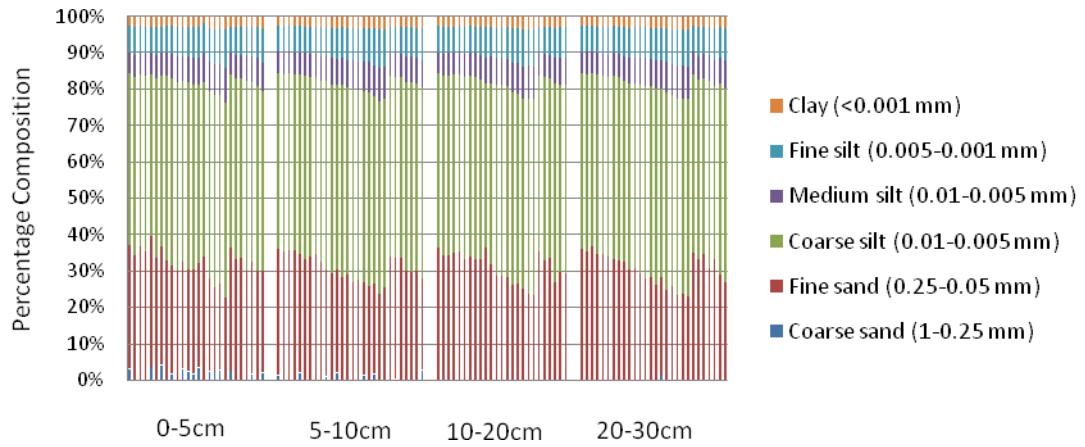

Supplemental Figure 2. Soil particle size distribution in the Yangjuangou watershed located in the northern Shaanxi Province (unpublished data).
